# Supplementary material for: Quantitative imaging biomarkers for risk stratification of patients with recurrent glioblastoma treated with bevacizumab
Source: Oxford University Press journal article supplement (doi:10.1093/neuonc/nox092), 2017-05-06
Supplement: nox092_suppl_04_revision_dfci-update_supplementary_material_v2.pdf [file nox092_suppl_04_revision_dfci-update_supplementary_material_v2.pdf]

## SUPPLEMENTARY MATERIAL

### Supplementary File 1: Radiomic feature definitions.

We analyzed ten quantitative features each from tumors segmented under T1-weighted and FLAIR imaging at baseline and six weeks follow-up. These features can broadly be categorized into 1) first-order statistics of the histogram of all voxels, 2) tumor shape features, and 3) features quantifying tumor texture. To quantify texture, we used three texture matrices that hold the number of textural patterns found in an image. To define these matrices and features that are calculated using these matrices in the following, we first define  $N_g$  to be the number of discrete gray-levels and  $N_p$  to be the number of voxels in an image. More information can be found in the Supplementary Material of Aerts et al., Nature Communications 2014 and Coroller et al., Radiotherapy & Oncology 2015.

**GLCM.** A Gray-Level Co-occurrence matrix (GLCM)  $P(i, j; \delta, \alpha)$  of size  $N_g \times N_g$  describes the second-order joint probability function of an image, where the  $P(i, j)$  is the number of times the combination of intensity values  $i$  and  $j$  occur in two pixels in the image which are separated from each other by  $\delta$  pixels in direction  $\alpha$ . Furthermore, we define  $\mu = \text{mean}(P(i, j))$ ,  $p_x(i) = \sum_{j=1}^{N_g} P(i, j)$  are the marginal row probabilities,  $p_y(i) = \sum_{i=1}^{N_g} P(i, j)$  are the marginal column probabilities,  $\mu_x$  is the mean of  $p_x$ ,  $\mu_y$  the mean of  $p_y$ ,  $\sigma_x$  is the standard deviation of  $p_x$ ,  $\sigma_y$  the standard deviation of  $p_y$ ,  $HX = -\sum_{i=1}^{N_g} p_x(i) \log_2[p_x(i)]$  be the entropy of  $p_x$ ,  $HY = -\sum_{i=1}^{N_g} p_y(i) \log_2[p_y(i)]$  be the entropy of  $p_y$ , and  $H = -\sum_{i=1}^{N_g} \sum_{j=1}^{N_g} P(i, j) \log_2[P(i, j)]$  be the entropy of  $P(i, j)$ . Finally,  $HXY1 = -\sum_{i=1}^{N_g} \sum_{j=1}^{N_g} P(i, j) \log(p_x(i)p_y(j))$ , and  $HXY2 = -\sum_{i=1}^{N_g} \sum_{j=1}^{N_g} p_x(i)p_y(j) \log(p_x(i)p_y(j))$ . The latter denotations are required to define those textural features that use a GLCM.

**RLGL.** A Run-Length Gray-Level matrix (RLGL) is used to quantify gray-level runs of different lengths in an image. A gray-level run is a stretch of consecutive pixels that have the same gray-level value. In an RLGL  $p(i, j|\theta)$ , the  $(i, j)$ th element describes the number of times  $j$  a gray level  $i$  appears consecutively in direction  $\theta$ . Furthermore, we define  $N_r$  to be the number of different run lengths in an image.

**GLSZM.** A Gray-Level Size-Zone Matrix (GLSZM) quantifies the number of size-zones in an image. Instead of quantifying in several directions as the GLCM or RLGL, a GLSZM quantifies a flat size-zone in the entire 3D image. A flat size-zone is a group of connecting pixels with the same gray level in any direction. In a GLSZM  $p(i, j)$ , the  $(i, j)$ th element describes the frequency of matrices of size  $j$  with gray level  $i$ . For features using a GLSZM, we define  $N_r$  to be the number of different size-zones in an image.

**Supplementary Table 1: Features derived from T1-weighted imaging.**

| Category | Feature                           | Description                                                                  | Matrix | Formula                                                                                                                     |
|----------|-----------------------------------|------------------------------------------------------------------------------|--------|-----------------------------------------------------------------------------------------------------------------------------|
| Texture  | Cluster Shade                     | Lack of symmetry of texture matrix.                                          | GLCM   | $\sum_{i=1}^{N_g} \sum_{j=1}^{N_g} [i + j - \mu_x(i) - \mu_y(j)]^3 P(i, j)$                                                 |
| Texture  | Correlation                       | Linear dependency of gray-levels in neighboring pixels.                      | GLCM   | $\frac{\sum_{i=1}^{N_g} \sum_{j=1}^{N_g} ijP(i, j) - \mu_x(i)\mu_y(j)}{\sigma_x(i)\sigma_y(j)}$                             |
| Texture  | Energy                            | Total sum of squared texture values (i.e., signal variance).                 | GLCM   | $\sum_{i=1}^{N_g} \sum_{j=1}^{N_g} [P(i, j)]^2$                                                                             |
| Texture  | Informational correlation 1       | Standardized correlation of entropy.                                         | GLCM   | $\frac{HXY - HXY1}{\max\{HX, HY\}}$                                                                                         |
| Texture  | Informational correlation 2       | Exponentially weighted correlation of entropy.                               | GLCM   | $\sqrt{1 - e^{-2(HXY2 - HXY)}}$                                                                                             |
| Texture  | Intensity variability             | Normalized energy of gray-level size-zones.                                  | GLSZM  | $\frac{\sum_{i=1}^{N_g} [\sum_{j=1}^{N_r} p(i, j)]^2}{\sum_{i=1}^{N_g} \sum_{j=1}^{N_r} p(i, j)}$                           |
| Texture  | Low-intensity large-area emphasis | Quantifies gray-level size-zones with low intensity that cover a large area. | GLSZM  | $\frac{\sum_{i=1}^{N_g} \sum_{j=1}^{N_r} \left[ \frac{p(i, j)j^2}{i^2} \right]}{\sum_{i=1}^{N_g} \sum_{j=1}^{N_r} p(i, j)}$ |
| Texture  | Small-area emphasis               | Weights small neighboring areas.                                             | GLSZM  | $\frac{\sum_{i=1}^{N_g} \sum_{j=1}^{N_r} \left[ \frac{p(i, j)}{j^2} \right]}{\sum_{i=1}^{N_g} \sum_{j=1}^{N_r} p(i, j)}$    |
| Texture  | Zone Percentage                   | Ratio of homogenous tumor zones and the total voxel count.                   | GLSZM  | $\sum_{i=1}^{N_g} \sum_{j=1}^{N_r} \frac{p(i, j)}{N_p}$                                                                     |

**Supplementary Table 2: Features derived from FLAIR imaging.**

| Category              | Feature                           | Description                                                                                   | Matrix | Formula                                                                                                                                |
|-----------------------|-----------------------------------|-----------------------------------------------------------------------------------------------|--------|----------------------------------------------------------------------------------------------------------------------------------------|
| Texture               | Max Probability                   | The highest number of times a combination of pixels was found.                                | GLCM   | $\max\{P(i, j)\}$                                                                                                                      |
| Texture               | Low-intensity small-area emphasis | Quantifies gray-level size-zones with low intensity that cover a large area                   | GLSZM  | $\frac{\sum_{i=1}^{N_g} \sum_{j=1}^{N_r} \left[ \frac{p(i, j)}{i^2 j^2} \right]}{\sum_{i=1}^{N_g} \sum_{j=1}^{N_r} p(i, j)}$           |
| Texture               | Size-zone variability             | Variance in sizes of uniform zones.                                                           | GLSZM  | $\frac{\sum_{j=1}^{N_r} \left[ \sum_{i=1}^{N_g} p(i, j) \right]^2}{\sum_{i=1}^{N_g} \sum_{j=1}^{N_r} p(i, j)}$                         |
| Texture               | Zone percentage                   | Ratio of homogenous tumor zones and the total pixel count.                                    | GLSZM  | $\sum_{i=1}^{N_g} \sum_{j=1}^{N_r} \frac{p(i, j)}{N_p}$                                                                                |
| Texture               | Low-gray level-run emphasis       | Quantifies number consecutive stretches of low gray-levels in the texture matrix of the image | RLGL   | $\frac{\sum_{i=1}^{N_g} \sum_{j=1}^{N_r} \left[ \frac{p(i, j \theta)}{i^2} \right]}{\sum_{i=1}^{N_g} \sum_{j=1}^{N_r} p(i, j \theta)}$ |
| Shape                 | Compactness                       | Compactness of tumor volume.                                                                  |        | $\frac{V}{\sqrt{\pi A^3}}$                                                                                                             |
| Shape                 | Spherical disproportion           | Sphericity of tumor volume.                                                                   |        | $\frac{A}{4\pi R^2}$                                                                                                                   |
| First-order statistic | Kurtosis                          | Existence of extreme values.                                                                  |        | $\frac{\frac{1}{N} \sum_{i=1}^N (X(i) - \bar{X})^4}{\left( \sqrt{\frac{1}{N} \sum_{i=1}^N (X(i) - \bar{X})^2} \right)^2}$              |
| First-order statistic | Median                            | Median voxel intensity.                                                                       |        | $median(X)$                                                                                                                            |
| First-order statistic | Minimum                           | Minimum voxel intensity.                                                                      |        | $\min(X)$                                                                                                                              |

**Supplementary File 2: R output detailing library version of statistical packages used for analysis.**

R version 3.1.0 (2014-04-10)

Platform: x86\_64-unknown-linux-gnu (64-bit)

locale:

[1] LC\_CTYPE=en\_US.UTF-8 LC\_NUMERIC=C  
[3] LC\_TIME=en\_US.UTF-8 LC\_COLLATE=en\_US.UTF-8  
[5] LC\_MONETARY=en\_US.UTF-8 LC\_MESSAGES=en\_US.UTF-8  
[7] LC\_PAPER=en\_US.UTF-8 LC\_NAME=C  
[9] LC\_ADDRESS=C LC\_TELEPHONE=C  
[11] LC\_MEASUREMENT=en\_US.UTF-8 LC\_IDENTIFICATION=C

attached base packages:

[1] grid stats4 parallel splines stats graphics grDevices  
[8] utils datasets methods base

other attached packages:

[1] randomForest\_4.6-12 kernlab\_0.9-23 glmnet\_2.0-2  
[4] foreach\_1.4.2 Matrix\_1.1-4 rmeta\_2.16  
[7] km.ci\_0.5-2 gplots\_2.15.0 pROC\_1.7.3  
[10] reshape2\_1.4.1 caret\_6.0-41 ggplot2\_1.0.0  
[13] lattice\_0.20-29 FactoMineR\_1.28 RadioGx\_1.9  
[16] mRMRe\_2.0.5 igraph\_0.7.1 cgdsr\_1.1.33  
[19] eisa\_1.18.0 isa2\_0.3.3 GO.db\_3.0.0  
[22] RSQLite\_1.0.0 DBI\_0.3.1 RamiGO\_1.12.0  
[25] gsubfn\_0.6-6 proto\_0.3-10 genefu\_1.15.1  
[28] biomaRt\_2.22.0 mclust\_4.4 AnnotationDbi\_1.28.1  
[31] GenomInfoDb\_1.2.3 IRanges\_2.0.1 S4Vectors\_0.4.0  
[34] Biobase\_2.26.0 BiocGenerics\_0.12.1 survcomp\_1.16.0  
[37] proclim\_1.5.1 survival\_2.37-7 dplyr\_0.4.1

loaded via a namespace (and not attached):

[1] amap\_0.8-12 annotate\_1.44.0 assertthat\_0.1  
[4] bitops\_1.0-6 bootstrap\_2014.4 BradleyTerry2\_1.0-5  
[7] brglm\_0.5-9 car\_2.0-22 Category\_2.32.0  
[10] caTools\_1.17.1 class\_7.3-11 cluster\_1.15.3  
[13] codetools\_0.2-9 colorspace\_1.2-4 compiler\_3.1.0  
[16] digest\_0.6.6 e1071\_1.6-7 gdata\_2.13.3  
[19] genefilter\_1.48.1 graph\_1.44.1 GSEABase\_1.28.0  
[22] gtable\_0.1.2 gtools\_3.4.1 iterators\_1.0.7

[25] KernSmooth\_2.23-13 labeling\_0.3 lava\_1.3  
[28] lazyeval\_0.1.10 leaps\_2.9 lme4\_1.1-7  
[31] magrittr\_1.5 MASS\_7.3-35 minqa\_1.2.4  
[34] munsell\_0.4.2 nlme\_3.1-118 nloptr\_1.0.4  
[37] nnet\_7.3-11 plyr\_1.8.1 png\_0.1-7  
[40] RBGL\_1.42.0 RColorBrewer\_1.1-2 Rcpp\_0.11.3  
[43] RCurl\_1.95-4.5 RCytoscape\_1.16.0 R.methodsS3\_1.6.1  
[46] RMiscPG\_1.0 R.oo\_1.18.0 R.utils\_1.34.0  
[49] scales\_0.2.4 scatterplot3d\_0.3-35 stringr\_0.6.2  
[52] SuppDists\_1.1-9.1 survivalROC\_1.0.3 tcltk\_3.1.0  
[55] tools\_3.1.0 XML\_3.98-1.1 XMLRPC\_0.3-0  
[58] xtable\_1.7-4

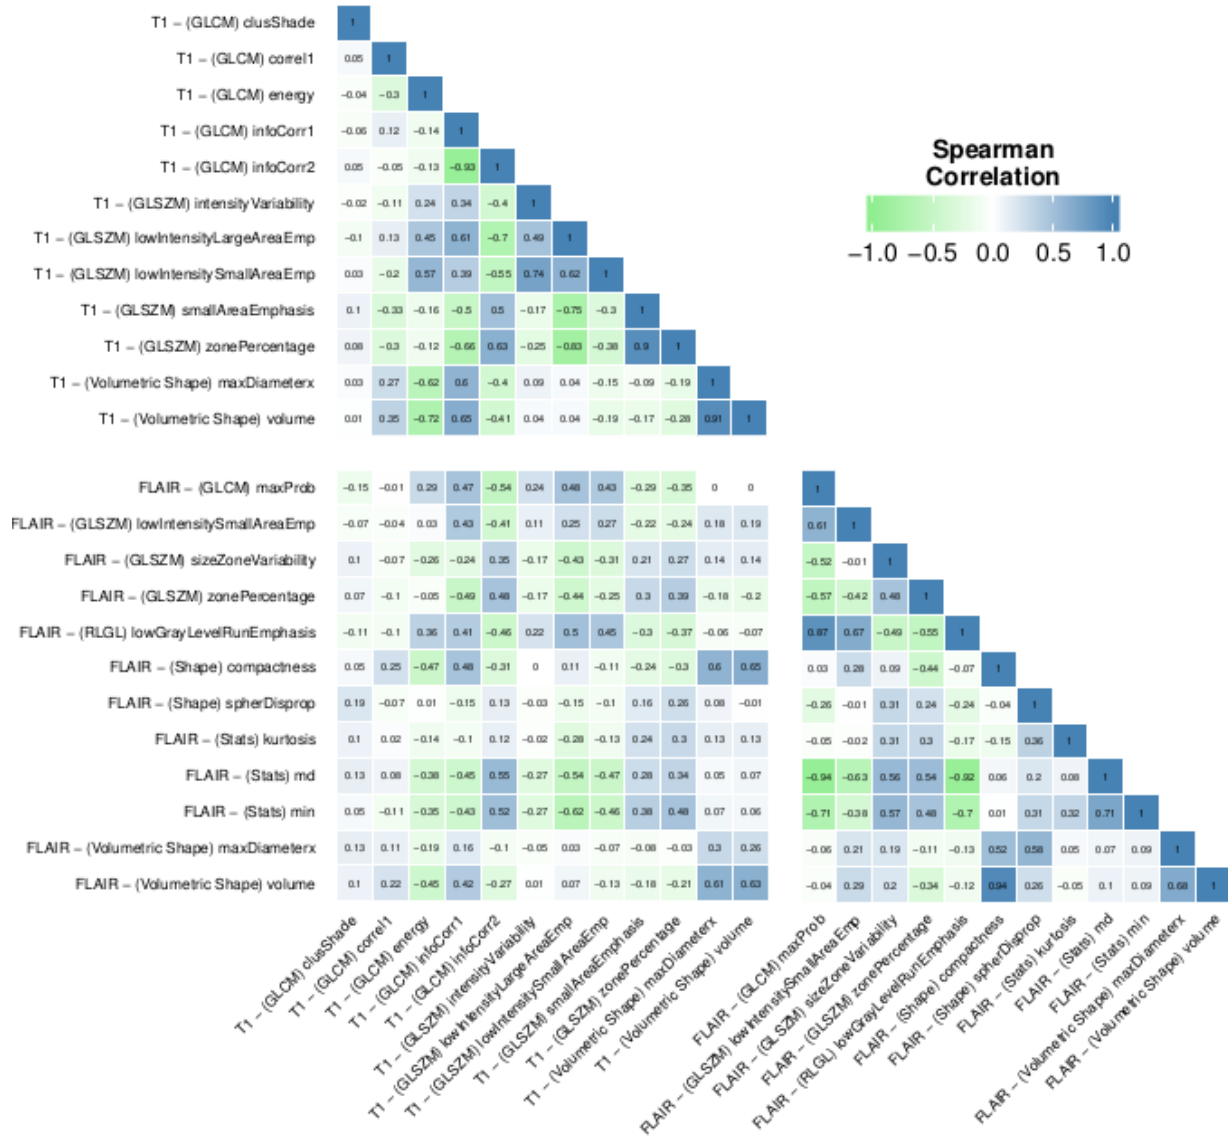

**Supplementary Figure 1: Pairwise Spearman rank correlation of all features derived from T1-weighted and FLAIR imaging at baseline. Correlation was generally low indicating independence of individual feature pairs.**

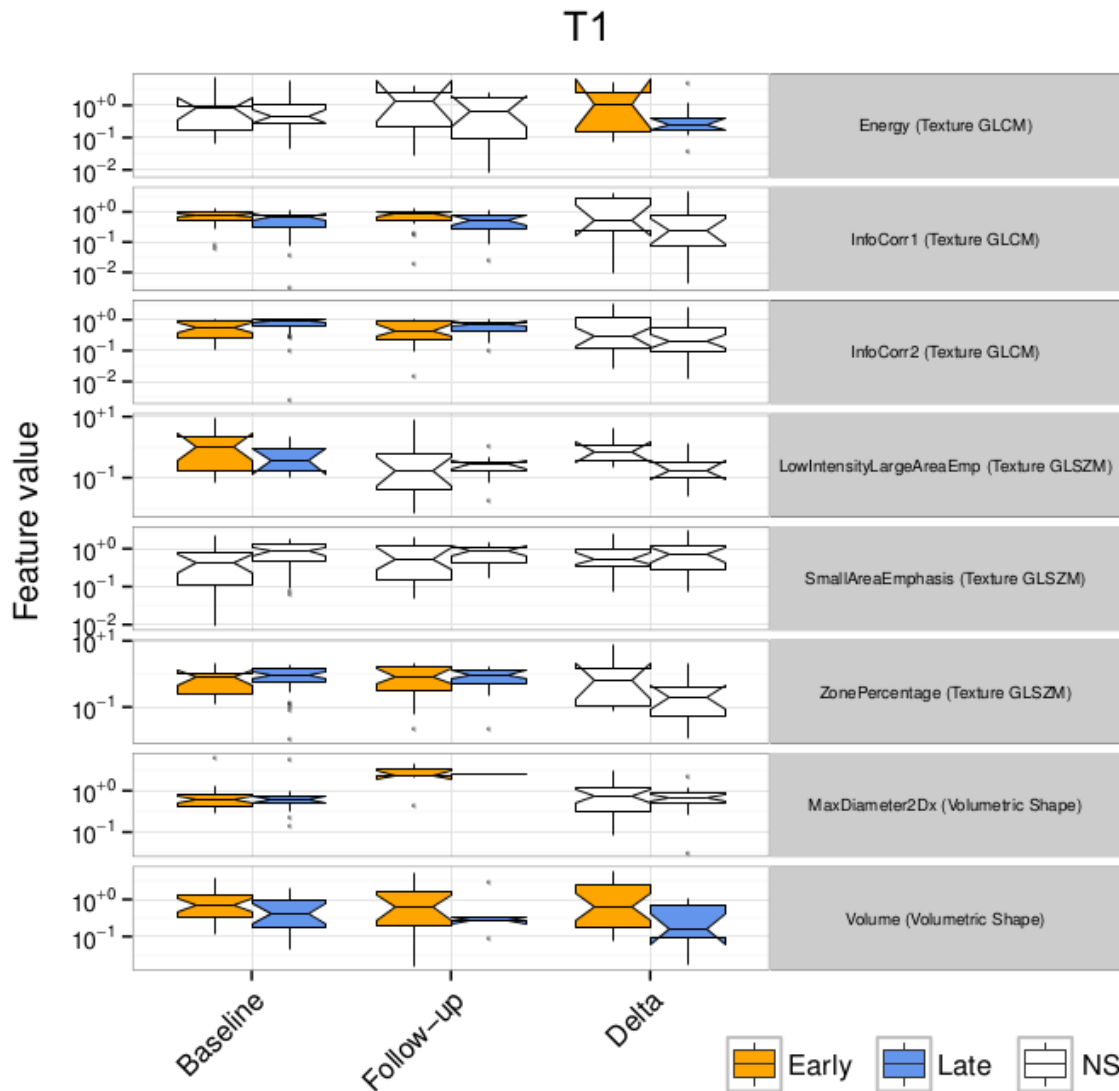

**Supplementary Figure 2:** Values distribution in early (< 3 months) and late (> 6 months) progressors of selected features (see Fig. 3). Significant differences (Wilcoxon rank-sum test  $p < 0.05$ ) in feature value distribution (displayed as log<sub>10</sub> scaled Z-scores) of early versus late progression was observed only for features derived from post-contrast T1-weighted imaging (colored bars). Notably, intra-tumor heterogeneity, as measured by information correlation, was significantly greater for patients progressing early as compared to patients progressing late.



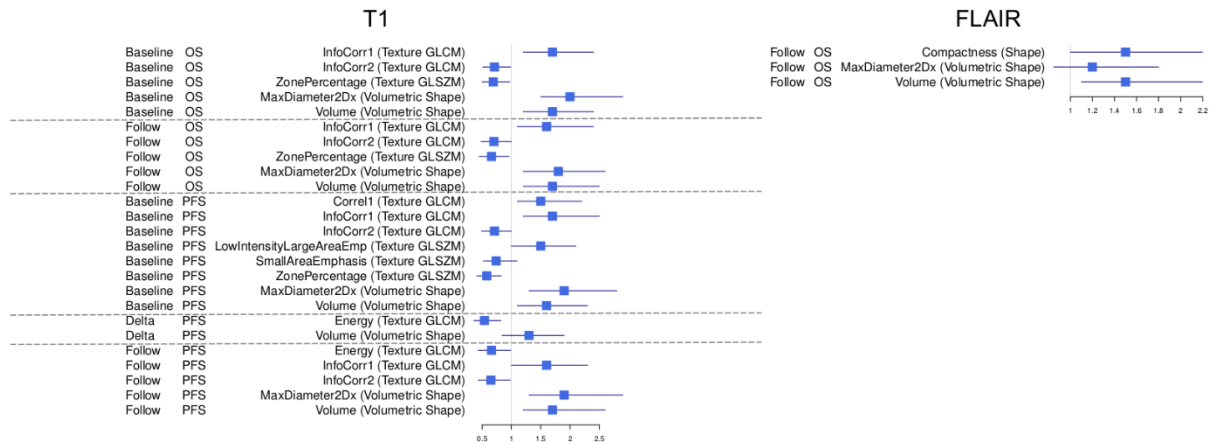

**Supplementary Figure 3: Stratification power of radiomic features.** Hazard-ratios for overall survival (OS) and progression-free survival (PFS) displayed with 95% confidence intervals of significant prognostic features (see Fig. 3) for baseline and follow-up imaging, as well as for the delta between baseline and follow-up.

**Supplementary Table 3:** Hazard-ratio (HR) statistics of features that performed significantly for

an imaging modality, clinical endpoint, and timepoint (compare Fig. 3). Other abbreviations:

$p$ =p-value of one-sided t-test, SE=standard error, ci=95% confidence interval.

| Modality | Endpoint | Timepoint | Feature                         | HR   | p       | SE   | ci lower | ci upper |
|----------|----------|-----------|---------------------------------|------|---------|------|----------|----------|
| FLAIR    | OS       | Follow    | Shape_compactness               | 1.5  | 0.031   | 0.19 | 1        | 2.2      |
| FLAIR    | OS       | Follow    | Volumetric_Shape_maxDiameter2Dx | 1.2  | 0.27    | 0.19 | 0.85     | 1.8      |
| FLAIR    | OS       | Follow    | Volumetric_Shape_volume         | 1.5  | 0.024   | 0.19 | 1.1      | 2.2      |
| T1       | OS       | Baseline  | GLCM_infoCorr1                  | 1.7  | 0.002   | 0.17 | 1.2      | 2.4      |
| T1       | OS       | Baseline  | GLCM_infoCorr2                  | 0.71 | 0.042   | 0.17 | 0.51     | 0.99     |
| T1       | OS       | Baseline  | GLSZM_zonePercentage            | 0.69 | 0.03    | 0.17 | 0.5      | 0.97     |
| T1       | OS       | Baseline  | Volumetric_Shape_maxDiameter2Dx | 2    | 3.4e-05 | 0.17 | 1.5      | 2.9      |
| T1       | OS       | Baseline  | Volumetric_Shape_volume         | 1.7  | 0.0012  | 0.17 | 1.2      | 2.4      |
| T1       | OS       | Follow    | GLCM_infoCorr1                  | 1.6  | 0.015   | 0.2  | 1.1      | 2.4      |
| T1       | OS       | Follow    | GLCM_infoCorr2                  | 0.7  | 0.062   | 0.19 | 0.48     | 1        |
| T1       | OS       | Follow    | GLSZM_zonePercentage            | 0.66 | 0.031   | 0.19 | 0.45     | 0.96     |
| T1       | OS       | Follow    | Volumetric_Shape_maxDiameter2Dx | 1.8  | 0.0037  | 0.2  | 1.2      | 2.6      |
| T1       | OS       | Follow    | Volumetric_Shape_volume         | 1.7  | 0.0072  | 0.2  | 1.2      | 2.5      |
| T1       | PFS      | Baseline  | GLCM_correl1                    | 1.5  | 0.024   | 0.18 | 1.1      | 2.2      |
| T1       | PFS      | Baseline  | GLCM_infoCorr1                  | 1.7  | 0.0029  | 0.18 | 1.2      | 2.5      |
| T1       | PFS      | Baseline  | GLCM_infoCorr2                  | 0.71 | 0.056   | 0.18 | 0.49     | 1        |
| T1       | PFS      | Baseline  | GLSZM_lowIntensityLargeAreaEmp  | 1.5  | 0.037   | 0.18 | 1        | 2.1      |
| T1       | PFS      | Baseline  | GLSZM_smallAreaEmphasis         | 0.74 | 0.092   | 0.18 | 0.52     | 1.1      |
| T1       | PFS      | Baseline  | GLSZM_zonePercentage            | 0.58 | 0.0031  | 0.18 | 0.41     | 0.83     |
| T1       | PFS      | Baseline  | Volumetric_Shape_maxDiameter2Dx | 1.9  | 0.00039 | 0.18 | 1.3      | 2.8      |
| T1       | PFS      | Baseline  | Volumetric_Shape_volume         | 1.6  | 0.011   | 0.18 | 1.1      | 2.3      |
| T1       | PFS      | Delta     | GLCM_energy                     | 0.54 | 0.0037  | 0.21 | 0.36     | 0.82     |
| T1       | PFS      | Delta     | Volumetric_Shape_volume         | 1.3  | 0.26    | 0.21 | 0.84     | 1.9      |
| T1       | PFS      | Follow    | GLCM_energy                     | 0.66 | 0.045   | 0.21 | 0.43     | 0.99     |
| T1       | PFS      | Follow    | GLCM_infoCorr1                  | 1.6  | 0.032   | 0.21 | 1        | 2.3      |
| T1       | PFS      | Follow    | GLCM_infoCorr2                  | 0.65 | 0.04    | 0.21 | 0.43     | 0.98     |
| T1       | PFS      | Follow    | Volumetric_Shape_maxDiameter2Dx | 1.9  | 0.0024  | 0.21 | 1.3      | 2.9      |
| T1       | PFS      | Follow    | Volumetric_Shape_volume         | 1.7  | 0.0083  | 0.21 | 1.2      | 2.6      |

**Supplementary Table 4:** Sensitivity and specificity of multivariable overall survival and progression models on validation data reported in Fig. 4.

|             | <b>One-year<br/>Overall Survival</b> | <b>3 months<br/>progression</b> | <b>6 months<br/>progression</b> | <b>9 months<br/>progression</b> |
|-------------|--------------------------------------|---------------------------------|---------------------------------|---------------------------------|
| Sensitivity | 0.60                                 | 0.48                            | 0.70                            | 0.50                            |
| Specificity | 0.77                                 | 0.65                            | 0.69                            | 0.84                            |

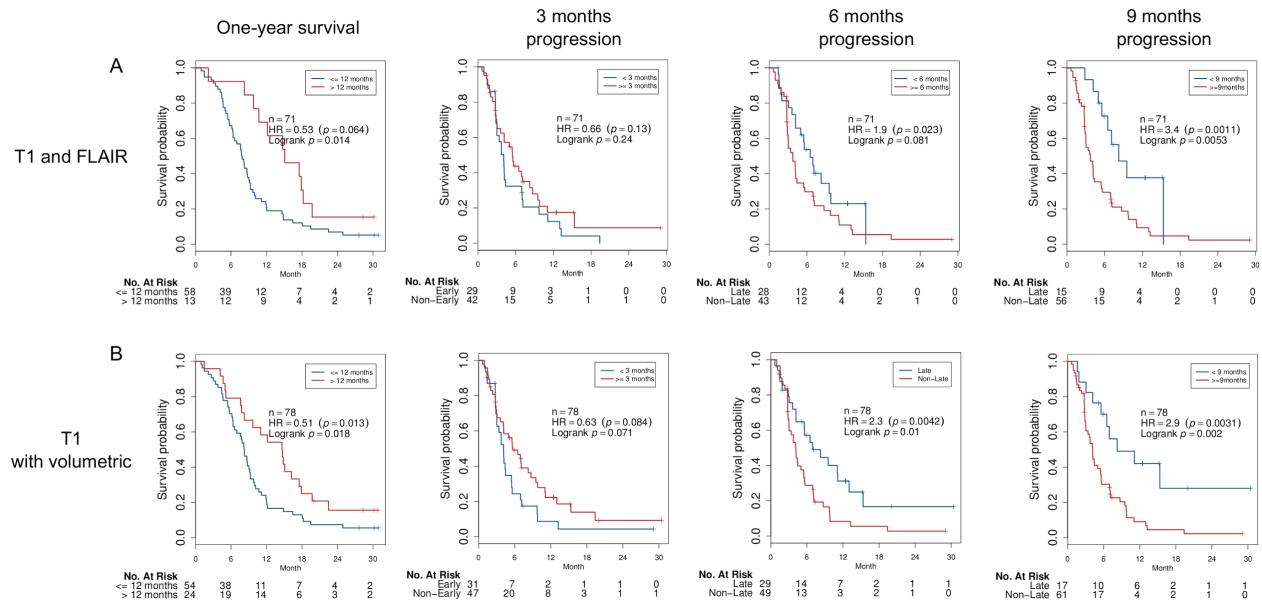

**Supplementary Figure 4: Kaplan-Meier estimates of baseline progression and overall survival models.** Models included the combination of post-contrast T1-weighted imaging derived features selected from delta as presented in Fig. 4 of the manuscript. In addition, the models here combined **(A)** post-contrast T1-weighted imaging derived and volumetric features **(B)** features derived from both post-contrast T1-weighted and FLAIR imaging. All models have been adjusted for age, sex, and Karnofsky performance status at baseline.
